# Supplementary material for: Pellet-free isolation of human and bovine milk extracellular vesicles by size-exclusion chromatography
Source: PubMed Central journal article supplement — J Extracell Vesicles. 2017 Mar 15;6(1):1294340. doi: 10.1080/20013078.2017.1294340 (PMC5373680; doi:10.1080/20013078.2017.1294340), 2017-03-15
Supplement: zjev_a_1294340_sm5613.pdf [file zjev_a_1294340_sm5613.pdf]

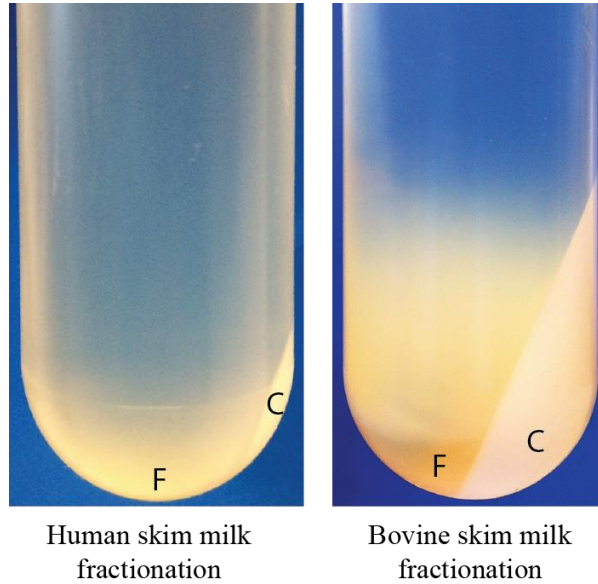

**Fig. S1 Location of the Fluff layer and casein pellet of ultracentrifuged human and bovine skim milk**

Human (left) and bovine (right) skim milk was ultracentrifuged in 39 mL tubes at 340,000 g for 1 hour at 4°C.

The tubes were imaged right before the yellowish Fluff layer was drawn from the tubes.

Approximately 0.5 mL of human Fluff layer (F) and 1 mL of bovine Fluff layer could be drawn using a long glass pipet from one tube of ultracentrifuged skim milk. The marked difference in the casein content of human and bovine milk is reflected in the differently sized casein pellets (C).

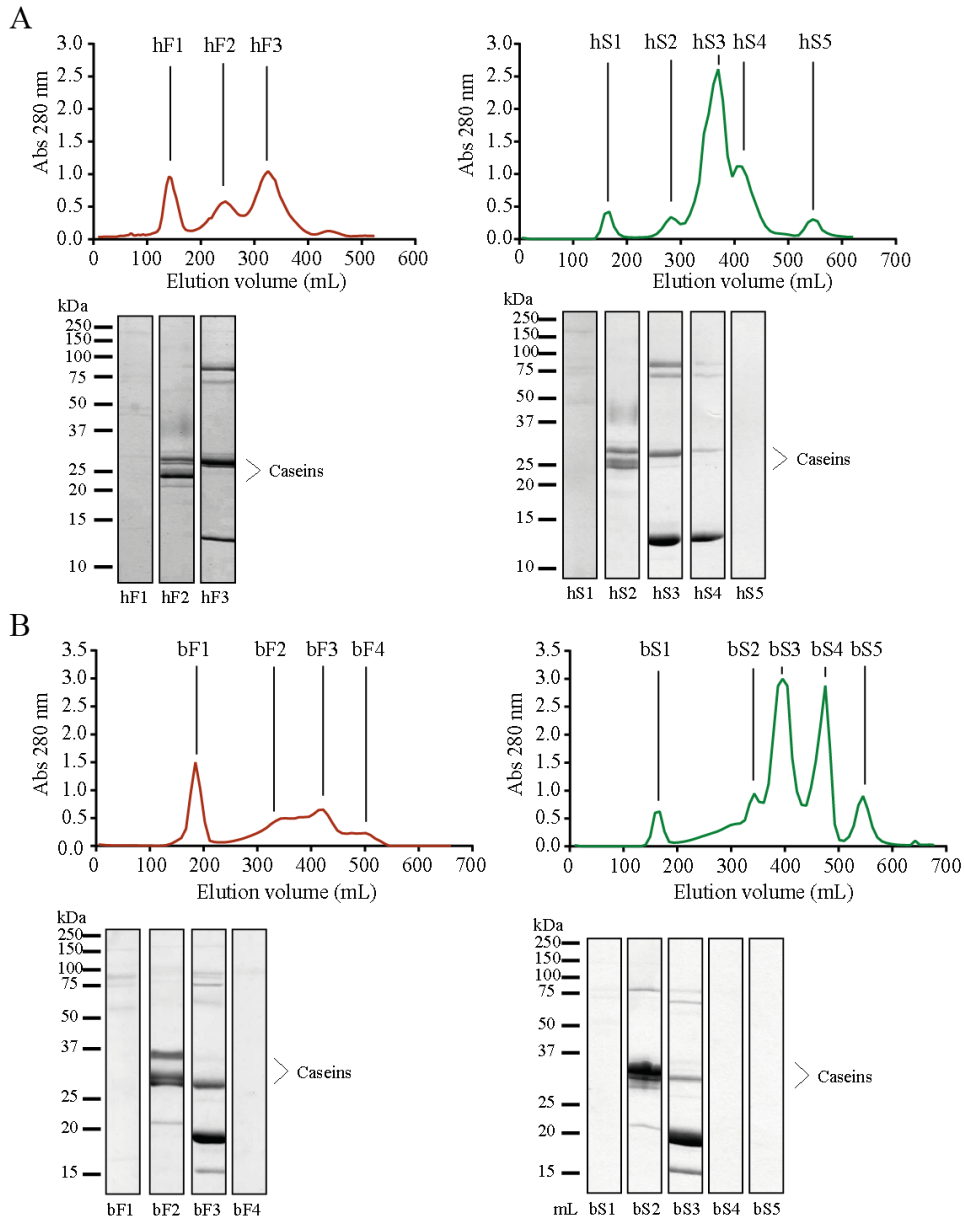

**Fig. S2 Protein profiles in Fluff layer and Milk Serum SEC fractions**

MEV isolation was performed as described in the materials and methods section.

SEC (size-exclusion chromatography) fractions were normalised to similar 280 nm absorbance values and separated by SDS-PAGE under reduced conditions followed by coomassie blue staining to visualise the fractions protein content.

A. Human Fluff (hF) and Serum (hS) SEC and SDS-PAGE profiles

B. Bovine Fluff (bF) and Serum (bS) SEC and SDS-PAGE profiles.

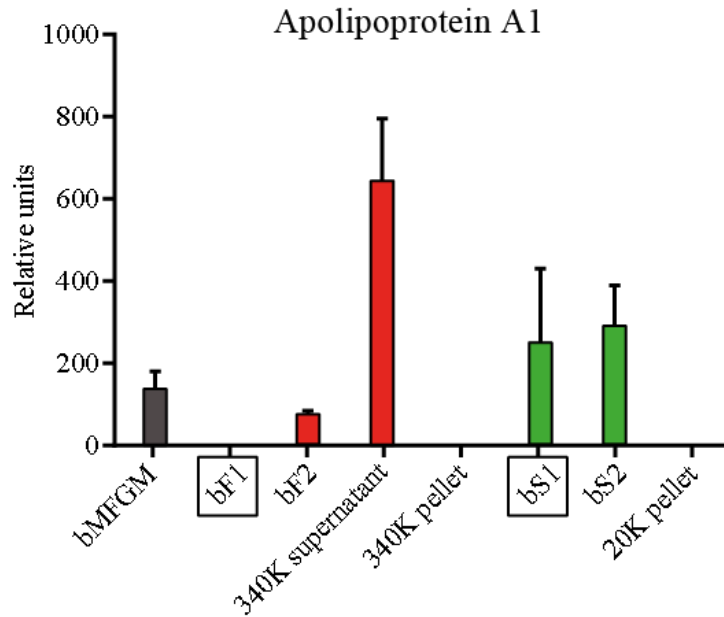

**Fig. S3 Relative Apolipoprotein A1 levels by LC-MS in bovine milk fractions from the Fluff layer (red) and Milk Serum (green) MEV isolation**

The peptide for quantification of apolipoprotein A1 (ApoA1) was selected solely on a theoretical level and the optimization of transitions was performed on non-labelled synthetic peptides (Thermo Fisher). Digestion, separation, detection and analysis of the resulting peptides were performed as described in the materials and methods section. MS transitions for the selected peptide can be found in **Table S2**.

LC-MS: Liquid Chromatography-Mass Spectrometry, bF1: Bovine Fluff MEV, bF2: Bovine Fluff 2. SEC peak, bS1: Bovine Milk Serum MEV, bS2: Bovine Milk Serum 2. SEC peak.

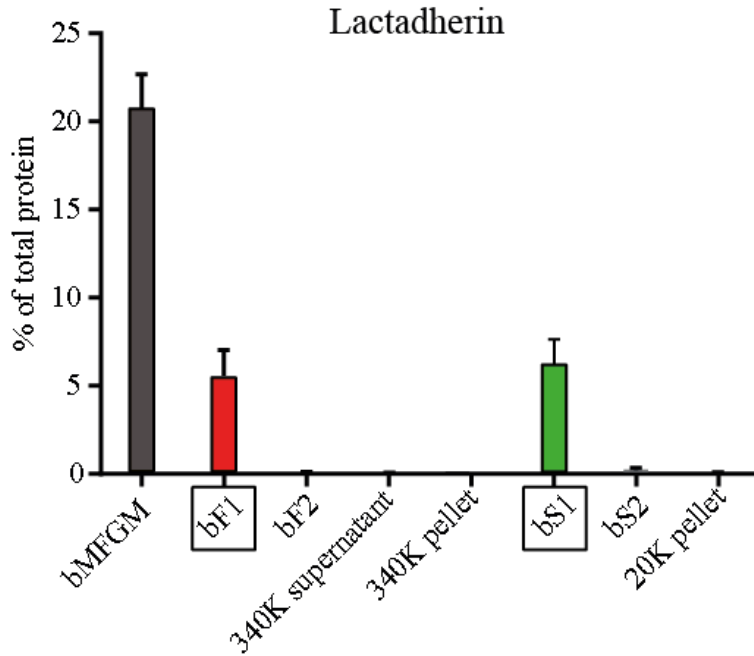

**Fig. S4 Absolute lactadherin quantification by LC-MS in bovine milk fractions from the Fluff layer (red) and Milk Serum (green) MEV isolation**

Bovine lactadherin (ID:Q95114) was quantified absolutely in milk fractions using the isotope labelled lactadherin peptide (VTGIITQGA[R(<sup>13</sup>C<sub>6</sub> <sup>15</sup>N<sub>4</sub>)] as internal standard. Absolute quantification was based on a standard curve of non-labelled synthetic lactadherin peptide added the labelled peptide and quantified by selective reaction monitoring by LC-MS. Digestion, separation, detection and analysis of the resulting peptide was performed as described in the materials and methods section. MS transitions for the selected peptide can be found in **Table S2**.

LC-MS: Liquid Chromatography-Mass Spectrometry, bF1: Bovine Fluff MEV, bF2: Bovine Fluff 2. SEC peak, bS1: Bovine Milk Serum MEV, bS2: Bovine Milk Serum 2. SEC peak.

| Abbreviation | Average RCF | Speed (RPM)       | Rotor type                                                         | Adjusted <i>k</i> factor | Run time (minutes) |
|--------------|-------------|-------------------|--------------------------------------------------------------------|--------------------------|--------------------|
| -            | 3400        | 4000 <sup>B</sup> | H-6000A <sup>1</sup><br>Swinging bucket, Sorvall                   | 12240.6                  | 35                 |
| -            | 1250        | 4000 <sup>H</sup> | Fiberlite F21-8x50y <sup>2</sup><br>Fixed angle, Thermo Scientific | 18474.1                  | 35                 |
| <b>20K</b>   | 20000       | 16000             | Fiberlite F21-8x50y <sup>2</sup><br>Fixed angle, Thermo Scientific | 1154.6                   | 60                 |
| <b>340K</b>  | 340000      | 68000             | Type 70 Ti fixed angle <sup>3</sup><br>Beckman Coulter             | 46.3                     | 60                 |

**Table S1. Relative centrifugal forces, speed, rotor type, adjusted clearing factor and run times applied in the isolation approaches.** Tubes were filled to nominal capacity. Applied centrifuges: 1. Sorvall RC5C, 2. Sorvall RC3C plus, 3. Beckman L8-70M ultracentrifuge. <sup>B</sup>Bovine milk, <sup>H</sup>Human milk.

Pellet-free isolation of human and bovine milk extracellular vesicles by size-exclusion chromatography

| Protein                        | Protein ID | Peptide position | Peptide                 | Fragmentor [V] | Transition [m/z] [M+2H] <sup>2+</sup> →[M+H] <sup>+</sup> |         |               |         |
|--------------------------------|------------|------------------|-------------------------|----------------|-----------------------------------------------------------|---------|---------------|---------|
|                                |            |                  |                         |                | Quantifier ion                                            | CE [mV] | Qualifier ion | CE [mV] |
| CD63 antigen                   | Q9XSK2     | 157-163          | ILAVTNK                 | 74             | 379.7 → 645.4                                             | 7       | 379.7 → 532.3 | 5       |
| CD9 antigen                    | P30932     | 169-175          | NLIDSLK                 | 127            | 401.7 → 575.3                                             | 5       | 401.7 → 462.3 | 8       |
| Lactadherin                    | Q95114     | 339-348          | VTGIITQGAR              | 124            | 508.3 → 645.4                                             | 13      | 508.3 → 532.3 | 14      |
| Lactadherin (labelled peptide) | Q95114     | -                | VTGIITQGA[R(13C6 15N4)] | 124            | 513.3 → 655.4                                             | 13      | 513.3 → 542.3 | 14      |
| β-casein                       | P02666     | 185-191          | VLPVPQK                 | 86             | 391.3 → 372.2                                             | 15      | 391.3 → 568.3 | 6       |
| α-S1 casein                    | P02662     | 106-115          | YLGYLEQLLR              | 143            | 634.9 → 529.3                                             | 27      | 634.9 → 401.3 | 22      |
| α-S2 casein                    | P02663     | 130-140          | NAVPIPTLNR              | 118            | 598.8 → 600.3                                             | 23      | 598.8 → 701.4 | 21      |
| Apolipoprotein A-I             | P15497     | 229-237          | AKPVLEDLR               | 136            | 520.8 → 841.5                                             | 13      | 520.8 → 645.4 | 17      |

**Table S2. Mass spectrometry transitions**
